# Supplementary material for: Alcohol and Hospitalized Road Traffic Injuries in the Philippines
Source: PubMed Central journal article supplement — Yale J Biol Med. 2014 Sep 3;87(3):307–19. (PMC4144285), 2014-09-03
Supplement: yjbm_87_3_307_appendix.pdf [file yjbm_87_3_307_appendix.pdf]

|                                  |  |
|----------------------------------|--|
| <b>Registration or ID Number</b> |  |
|----------------------------------|--|

|            |               |
|------------|---------------|
| <b>Age</b> | <b>Gender</b> |
|            |               |

**Mode of Transport: How was injured person traveling?**

|                              |                                    |            |
|------------------------------|------------------------------------|------------|
| Pedestrian                   | Non-motorized vehicle (bike, cart) | Motorcycle |
| Car                          | Pick-up, minibus, jeepney          | Truck      |
| Bus                          | Train/subway                       | Unknown    |
| Other – specify              |                                    |            |
| <b>All applicable codes:</b> |                                    |            |

**Type of Road User: What was the injured person doing?**

|                              |                  |           |
|------------------------------|------------------|-----------|
| Pedestrian                   | Driver           | Passenger |
| Unknown                      | Other – specify: |           |
| <b>All applicable codes:</b> |                  |           |

**Injuries Sustained**

|                              |               |                        |
|------------------------------|---------------|------------------------|
| Fracture                     | Sprain/Strain | Cut or open wounds     |
| Contusion/bruising           | Burn          | Concussion/head trauma |
| Internal injury              | Broken bones  | Unknown                |
| Other – specify              |               |                        |
| <b>All applicable codes:</b> |               |                        |

**Injury Type**

|                                                   |                                                               |                   |                   |
|---------------------------------------------------|---------------------------------------------------------------|-------------------|-------------------|
| Unintentional (direct result of traffic incident) | Intentional (deliberately inflicted on one person by another) | Medical case only | Medico-legal case |
| Other – specify                                   |                                                               |                   |                   |
| <b>All applicable codes:</b>                      |                                                               |                   |                   |

### Severity of Injuries

|                                                                                                                                      |                                                                         |                                                                             |
|--------------------------------------------------------------------------------------------------------------------------------------|-------------------------------------------------------------------------|-----------------------------------------------------------------------------|
| Mild injuries (small cuts or lacerations, bruising)                                                                                  | Moderate injuries (sprain/strain, deep cuts or open wounds, mild burns) | Severe injuries (fractures, dislocations severe contusions, moderate burns) |
| Very severe injuries (concussion/loss of consciousness, broken bones, internal injury/bleeding, severe burns, amputation, paralysis) | Unknown                                                                 | Other –specify                                                              |
| Other – specify:                                                                                                                     |                                                                         |                                                                             |
| <b>All applicable codes</b>                                                                                                          |                                                                         |                                                                             |

### Injury Severity Score

| Injury       | Abbreviated Injury Scale (AIS) |
|--------------|--------------------------------|
| Minor        | 1                              |
| Moderate     | 2                              |
| Serious      | 3                              |
| Severe       | 4                              |
| Critical     | 5                              |
| Unsurvivable | 6                              |

| Region                                         | Injury Description | AIS | ISS |
|------------------------------------------------|--------------------|-----|-----|
| Head and Neck                                  |                    |     |     |
| Verbal response                                |                    |     |     |
| Motor response                                 |                    |     |     |
| <b>Total ISS (top three squared and added)</b> |                    |     |     |

### Assessment of Impaired Consciousness (GCS Score)

|                      |                  |
|----------------------|------------------|
| Mild head injury     | GCS of 13-15     |
| Moderate head injury | GCS of 9-12      |
| Severe head injury   | GCS of 8 or less |

| <b>Response</b> | <b>Condition</b>    | <b>Score</b> |
|-----------------|---------------------|--------------|
| Eye opening     | Spontaneously       | 4            |
|                 | To speech           | 3            |
|                 | To pain             | 2            |
|                 | None                | 1            |
| Verbal response | Orientated          | 5            |
|                 | Confused            | 4            |
|                 | Inappropriate       | 3            |
|                 | Incomprehensible    | 2            |
|                 | None                | 1            |
| Motor response  | Obeys commands      | 6            |
|                 | Localizes to pain   | 5            |
|                 | Withdraws from pain | 4            |
|                 | Flexion to pain     | 3            |
|                 | Extension to pain   | 2            |
|                 | None                | 1            |
|                 | <b>Total GCS</b>    |              |

### **Alcohol Use**

|                                                  |  |
|--------------------------------------------------|--|
| Patient presented clinical signs of intoxication |  |
|--------------------------------------------------|--|

### **If Alcohol (1) then complete the following:**

#### **Assessment of Intoxication**

|                                                                                                                                                                                                                       |                                                                                                                                                                                                                                                                                             |                                                                                                                               |
|-----------------------------------------------------------------------------------------------------------------------------------------------------------------------------------------------------------------------|---------------------------------------------------------------------------------------------------------------------------------------------------------------------------------------------------------------------------------------------------------------------------------------------|-------------------------------------------------------------------------------------------------------------------------------|
| Mild intoxication (50mg/dL):<br>Smell of alcohol on breath,<br>Exuberance/loss of emotional<br>restraint/depressed mood,<br>impairment of attention and/or<br>judgment, conjunctival<br>injection and/or flushed face | Moderate intoxication<br>(100mg/dL): All or any of<br>mild intoxication symptoms<br>PLUS impairment of speech<br>(e.g. slurring), impairment of<br>motor coordination,<br>disturbances in behavioural<br>response, disturbances in<br>emotional responses, impaired<br>ability to cooperate | Severe intoxication<br>(200mg/dL): All or any of<br>mild/moderate intoxication<br>symptoms PLUS horizontal<br>gaze, nystagmus |
| Very severe intoxication<br>(300mg/dL): All or any of<br>mild/moderate/severe<br>intoxication symptoms PLUS<br>stuporous, heavy<br>sleeping/heavy snoring                                                             | Extremely severe intoxication<br>(400mg/dL): All or any of<br>mild/moderate/severe/very<br>severe intoxication symptoms<br>PLUS irregular breathing,<br>inhalation of vomit,<br>comatose/inability to be<br>aroused                                                                         | Unknown                                                                                                                       |
| Other – specify:                                                                                                                                                                                                      |                                                                                                                                                                                                                                                                                             |                                                                                                                               |

**All applicable codes:**

**Patient Assessment**

|                                      |  |
|--------------------------------------|--|
| Status of intake and medical history |  |
| Status of blood pressure             |  |
| Non-invasive procedures performed    |  |
| Laboratory testing for BAC performed |  |

**If lab testing (1), then**

|                                               |  |
|-----------------------------------------------|--|
| Did blood test determine presence of alcohol? |  |
|-----------------------------------------------|--|

**Results**

|                                                         |                                                      |                                                   |
|---------------------------------------------------------|------------------------------------------------------|---------------------------------------------------|
| Patient treated and sent home                           | Patient admitted to hospital,<br>no surgery required | Patient admitted to hospital,<br>surgery required |
| Patient referred to a specialist<br>or another facility | Unknown                                              |                                                   |
| Other – specify:                                        |                                                      |                                                   |
| <b>All applicable codes:</b>                            |                                                      |                                                   |
